# Supplementary material
Source: PubMed Central journal article supplement (PMC6861135)
Supplement: EMS84343-supplement-Supplementary_Tables_14_22.pdf [file EMS84343-supplement-Supplementary_Tables_14_22.pdf]

**Supplementary Table 14: Index Sort Antibodies**

| <b>Antibody</b> | <b>Clone</b> | <b>Manufacturer</b> |
|-----------------|--------------|---------------------|
| CD45 APC-H7     | 2D1          | BD Bioscience       |
| HLA-DR BV785    | L243         | Biolegend           |

**Supplementary Table 15: Cytospin/Mini Bulk Sort Antibodies**

|                | <b>Antibody</b>   | <b>Clone</b> | <b>Manufacturer</b> |
|----------------|-------------------|--------------|---------------------|
| <b>Panel 1</b> | CD14 APC-Cy7      | MφP9         | BD Bioscience       |
|                | CD34 APC          | 581          | BD Bioscience       |
|                | CD45 BUV395       | HI30         | BD Bioscience       |
|                | CD56 PE           | NCAM16.2     | BD Bioscience       |
|                | CD106 FITC        | 51-10C9      | BD Bioscience       |
|                | GYPA BV605        | GA-R2        | BD Bioscience       |
|                | HLA-DR BV785      | L243         | Biolegend           |
| <b>Panel 2</b> | CD14 PE CF594     | MφP9         | BD Bioscience       |
|                | CD34 APC-Cy7      | 581          | Biolegend           |
|                | CD41 AF700        | HIP8         | Biolegend           |
|                | CD45 BUV395       | HI30         | BD Bioscience       |
|                | CD56 PE           | NCAM16.2     | BD Bioscience       |
|                | CD94 APC          | REA113       | Miltenyi            |
|                | CD117 PE-Cy7      | 104D2        | Biolegend           |
|                | CD161 PerCP-Cy5.5 | HP-3G10      | Biolegend           |
|                | GYPA BV605        | GA-R2        | BD Bioscience       |
| HLA-DR BV785   | L243              | Biolegend    |                     |
| <b>Panel 3</b> | CD1c AF700        | L161         | Biolegend           |
|                | CD14 PE CF594     | MφP9         | BD Bioscience       |
|                | CD45RA BV510      | HI100        | Biolegend           |
|                | CD20 FITC         | L27          | BD Bioscience       |
|                | CD34 APC          | 581          | BD Bioscience       |
|                | CD45 APC-H7       | 2D1          | BD Bioscience       |
|                | CD38 PerCP-Cy5.5  | HB7          | Biolegend           |
|                | CD117 PE-Cy7      | 104D2        | Biolegend           |
|                | CD123 BUV395      | 7G3          | BD Bioscience       |
|                | GYPA BV605        | GA-R2        | BD Bioscience       |
|                | CLEC9A PE         | 8F9          | Biolegend           |
|                | HLA-DR BV785      | L243         | Biolegend           |

**Supplementary Table 16: HSC Culture with stroma Antibodies**

|              | <b>Antibody</b>        | <b>Clone</b> | <b>Manufacturer</b> |
|--------------|------------------------|--------------|---------------------|
| <b>Sort</b>  | CD3 FITC               | SK7          | BD Bioscience       |
|              | CD11c BV421            | B-Ly6        | BD Bioscience       |
|              | CD14 PE Dazzle         | HCD14        | Biolegend           |
|              | CD16 FITC              | NKP15        | BD Bioscience       |
|              | CD19 FITC              | 4G7          | BD Bioscience       |
|              | CD34 APC-Cy7           | 581          | Biolegend           |
|              | CD38 PerCP-Cy5.5       | HB-7         | Biolegend           |
|              | CD45 BUV395            | HI30         | BD Bioscience       |
|              | CD45RA BV510           | HI100        | BD Bioscience       |
|              | CD49f PE-Cy7           | GoH3         | eBioscience         |
|              | CD56 FITC              | NCAM16.2     | BD Bioscience       |
|              | CD90 APC               | 5E10         | Biolegend           |
|              | <b>Culture readout</b> | CD11b APC    | ICRF44              |
| CD14 APC-Cy7 |                        | HCD14        | Biolegend           |
| CD15 BUV395  |                        | HI98         | BD Bioscience       |
| CD41 FITC    |                        | HIP8         | Biolegend           |
| CD45 V500    |                        | HI30         | BD Bioscience       |
| CD56 PE      |                        | NCAM16.2     | BD Bioscience       |
| GYPA BV605   |                        | GA-R2        | BD Bioscience       |

**Supplementary Table 17: HSC Culture without stroma and B cell assay Antibodies**

|                                          | <b>Antibody</b> | <b>Clone</b>                           | <b>Manufacturer</b> |
|------------------------------------------|-----------------|----------------------------------------|---------------------|
| <b>No stroma and B cell culture Sort</b> | Lineage FITC    | UCHT1,<br>HCD14,<br>HIB19,2H7<br>HCD56 | Biolegend           |
|                                          | CD11c FITC      | 3.9                                    | Biolegend           |
|                                          | CD370 PE        | 8F9                                    | Biolegend           |
|                                          | CD49f PE-Cy5    | GoH3                                   | BD Bioscience       |
|                                          | CD38 PE-Cy7     | HIT2                                   | Biolegend           |
|                                          | CD90 APC        | 5E10                                   | BD Bioscience       |
|                                          | CD45RA AF700    | HI100                                  | Biolegend           |
|                                          | CD34 APC-Cy7    | 581                                    | Biolegend           |
|                                          | CD10 BV421      | HI10a                                  | BD Bioscience       |
|                                          | CD71BV650       | CY1G4                                  | Biolegend           |
|                                          | CD45 BV786      | 2D1                                    | Biolegend           |
|                                          | Zombie Aqua     | -                                      | Biolegend           |
| <b>No stroma culture readout</b>         | CD45 PE-Cy5     | HI30                                   | Biolegend           |
|                                          | CD41 FITC       | HIP8                                   | Biolegend           |
|                                          | CD11b APC-Cy7   | ICRF44                                 | Biolegend           |
|                                          | CD14 PE-Cy7     | M5E2                                   | Biolegend           |
|                                          | CD15 BV421      | MC-480                                 | Biolegend           |
|                                          | GYPA PE         | GA-R2                                  | BD Bioscience       |
|                                          | CD56 APC        | HCD56                                  | Biolegend           |
| <b>B cell culture readout</b>            | CD45 PE-Cy5     | HI30                                   | Biolegend           |
|                                          | CD19 FITC       | HIB19                                  | Biolegend           |
|                                          | CD19 AF700      | HIB19                                  | Biolegend           |
|                                          | CD11b APC-Cy7   | ICRF44                                 | Biolegend           |
|                                          | CD14 PE-Cy7     | B5E2                                   | Biolegend           |
|                                          | CD15 BV421      | MC-480                                 | Biolegend           |
|                                          | CD56 APC        | HCD56                                  | Biolegend           |

**Supplementary Table 18: Ki67 Assay Antibodies**

|                     | <b>Antibody</b> | <b>Clone</b>                             | <b>Manufacturer</b> |
|---------------------|-----------------|------------------------------------------|---------------------|
| <b>Ki67 Sort</b>    | Lineage FITC    | UCHT1,<br>HCD14,<br>HIB19, 2H7,<br>HCD56 | Biolegend           |
|                     |                 | 581                                      | Biolegend           |
|                     | CD11c FITC      | 3.9                                      | Biolegend           |
|                     | CD45RA PE       | HI100                                    | Biolegend           |
|                     | CD38 PE-Cy7     | HIT2                                     | Biolegend           |
|                     | CD90 APC        | 5E10                                     | BD Bioscience       |
|                     | CD34 APC-Cy7    | 581                                      | Biolegend           |
|                     | Zombie Aqua     | -                                        | Biolegend           |
| <b>Ki67 readout</b> | DAPI            | -                                        | Biolegend           |
|                     | Ki67 FITC       | B56                                      | BD Bioscience       |

**Supplementary Table 19: ImageStream Antibodies**

| <b>Antigen</b>   | <b>Clone</b> | <b>Manufacturer</b> | <b>Amount</b><br>( $\mu\text{L}/10 \times 10^6$ cells) |
|------------------|--------------|---------------------|--------------------------------------------------------|
| CD14 APC-Cy7     | M $\phi$ P9  | BD Bioscience       | 5                                                      |
| CD34 PE          | 8G12         | BD Bioscience       | 20                                                     |
| CD45 PerCP-Cy5.5 | 2D1          | BD Bioscience       | 20                                                     |
| CD106 FITC       | 51-10C9      | BD Bioscience       | 5                                                      |
| CD117 PE-Cy7     | 104D2        | Biolegend           | 5                                                      |
| GYPA BV605       | GA-R2        | BD Bioscience       | 3                                                      |
| HLA-DR APC       | L243         | BD Bioscience       | 3                                                      |

**Supplementary Table 20: IHC Antibodies**

| <b>Antigen</b> | <b>Clone</b> | <b>Host</b> | <b>Manufacturer</b> | <b>Concentration</b> |
|----------------|--------------|-------------|---------------------|----------------------|
| CD68           | KP1          | Mouse       | Biolegend           | 1:750                |
| GYPA           | R10          | Mouse       | R&D Systems         | 1:100                |
| CD49d          | polyclonal   | Rabbit      | LSBio               | 1:200                |
| VCAM1          | 1.43C        | Mouse       | ThermoFisher        | 1:100                |

**Supplementary Table 21: Hyperion Antibodies**

| <b>Antigen</b> | <b>Clone</b>     | <b>Metal Tag</b> | <b>Manufacturer</b> | <b>Amount</b><br>( $\mu\text{g}/\text{section}$ ) |
|----------------|------------------|------------------|---------------------|---------------------------------------------------|
| CD1c           | 2A7C11           | 170 Er           | Novus Bio           | 0.4                                               |
| CD20           | L26              | 141 Pr           | eBioscience         | 0.17                                              |
| CD34           | Qbend/10         | 172 Yb           | Biorad              | 0.8                                               |
| CD68           | KP1              | 153 Eu           | Biolegend           | 0.27                                              |
| CD79A          | JCB117 + HM47/A9 | 161 Dy           | Abcam               | 0.33                                              |
| CK19           | polyclonal       | 159 Tb           | Abcam               | 1.0                                               |
| CSP1/Heppar    | OCH1E5           | 167 Er           | Abcam               | 0.8                                               |
| GYPA           | R10              | 142 Nd           | R&D Systems         | 2.0                                               |

**Supplementary Table 22: Light sheet fluorescence microscopy Antibodies**

| <b>Antigen</b> | <b>Clone</b> | <b>Host</b> | <b>Manufacturer</b> | <b>Concentration</b> |
|----------------|--------------|-------------|---------------------|----------------------|
| CD34           | Qbend/10     | Mouse       | Agilent             | 1:100                |
| CD34           | EP373Y       | Rabbit      | Abcam               | 1:100                |
| GYPA           | R10          | Mouse       | R&D Systems         | 1:100                |
| GYPA           | EPR8200      | Rabbit      | Abcam               | 1:100                |
